# Supplementary material
Source: Research Square preprint supplement (doi:10.21203/rs.3.rs-9069577/v1)
Supplement: Supplementary file 1 [file 4f91e56e35d384ed3dd1dd1f.docx]

**SUPPLEMENTARY METHODS**

**Sampling and DNA processing**

The sample collection for this study was conducted in the municipality of Gonzaga, Cagayan, Philippines. A total of 72 dog stool samples were collected opportunistically from five barangays, Tapel (n = 11), Magrafil (n = 20), Sta. Maria (n = 17), Sta. Cruz (n = 16), and SMART (n = 8). Collection was restricted to the hours of 06:00-08:00 h to minimize DNA degradation from ultraviolet radiation and desiccation. Samples were partitioned into equal aliquots for molecular identification and stored at -80 °C for at least 1 week prior to processing. DNA was extracted from each sample using the DNeasy PowerSoil Pro Kit (Qiagen, Hilden, Germany). Final DNA was eluted in 100 µL AE buffer, and its concentration and purity were determined through spectrophotometry.

**Molecular analysis**

Sequential endpoint PCR of hookworm species was conducted in three primary stages: internal amplification control verification of host DNA, hookworm screening, species level identification.

To evaluate the success of DNA extraction and ensure the absence of PCR inhibitors, an internal control PCR targeting a conserved region of the canine mitochondrial gene NADH dehydrogenase subunit 5 (ND5) was performed. The primer pair used were Dog_MT_F (5’-GGCATGCCTTTCCTTACAGGATTC-3’) and Dog_MT_R (5’-GGGATGTGGCAACGAGTGTAATTATG-3’) from the previous study of Caldwell and Levine (2009).

All 72 samples were screened using RTHW1F (5'-GATGAGCATTGCWTGAATGCCG-3') and RTHW1R (5'-GCAAGTRCCGTTCGACAAACAG-3') primers from the previous study of Inpankaew et al. (2014) to amplify the highly conserved ITS 1, 5.8S, and ITS 2 regions. Each PCR reaction was performed in 25 µL reactions using GoTaq® Green Master Mix (Promega) with an initial denaturation at 95 ºC for 2 minutes, 40 cycles at 95 ºC for 30 seconds, 64 ºC for 30 seconds, and 72 ºC for 30 seconds, and a final extension at 72 ºC for 10 minutes. PCR products were visualized on 1% agarose gels in 1× TAE stained with GelRed (Biotium).

Only samples positive in the RTHW1 PCR were subjected to the downstream amplification targeting the ITS-1, 5.8S, and ITS-2 regions of *A. caninum*, *A. ceylanicum*, and *U. stenocephala* hookworms using RTGHF1 (5'-GAAATTGTTGAATTGCAGAC-3') and RTABCR1 (5'-CTGGATTTTCTTGAGCGTCT-3') primers from the previous study of Inpankaew et al. (2014). The number of cycles was increased to 50 to improve amplicon quantity for downstream sequencing.

The PCR product with target amplicons using both primer pairs was subjected to Sanger sequencing and PCR product purification (Macrogen, Inc., Seoul, Republic of Korea). Sequence data were trimmed and aligned using Pregap4 and Gap4 (Staden Package). Species identification was determined by comparing the obtained sequences with the GenBank database using the Basic Local Alignment Search Tool (BLAST), with ≥97% sequence identity required for species confirmation (Pappalardo et al. 2025).
